# Supplementary material for: An ABA-mimicking ligand that reduces water loss and promotes drought resistance in plants
Source: PubMed Central journal article supplement — Cell Res. 2013 Jul 9;23(8):1043–54. doi: 10.1038/cr.2013.95 (PMC3731570; doi:10.1038/cr.2013.95), 2013-07-09
Supplement: cr201395x2.pdf [file cr201395x2.pdf]

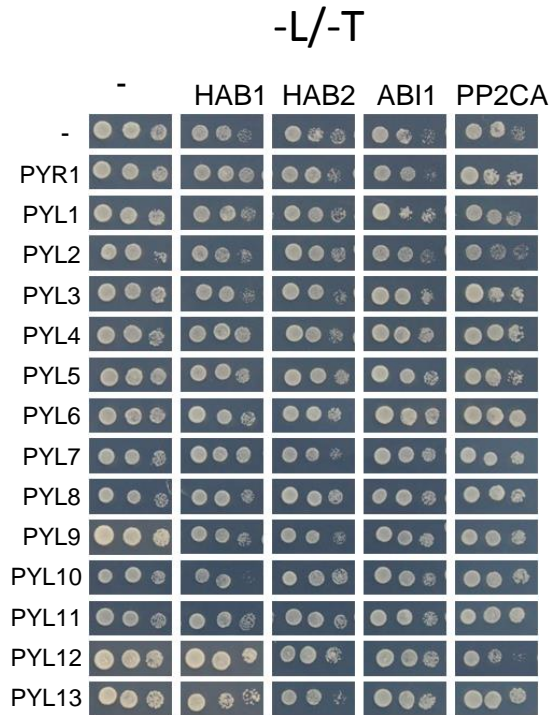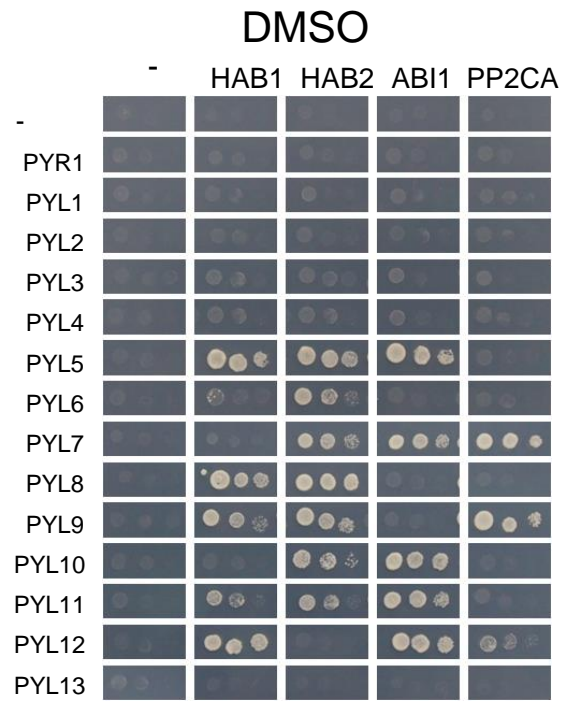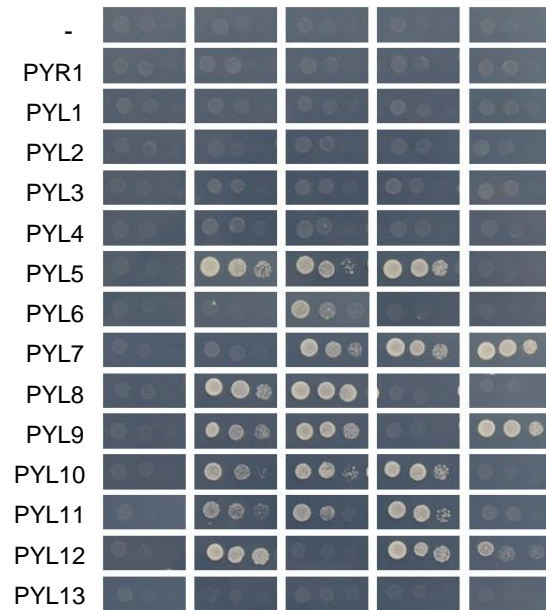

**AM2**

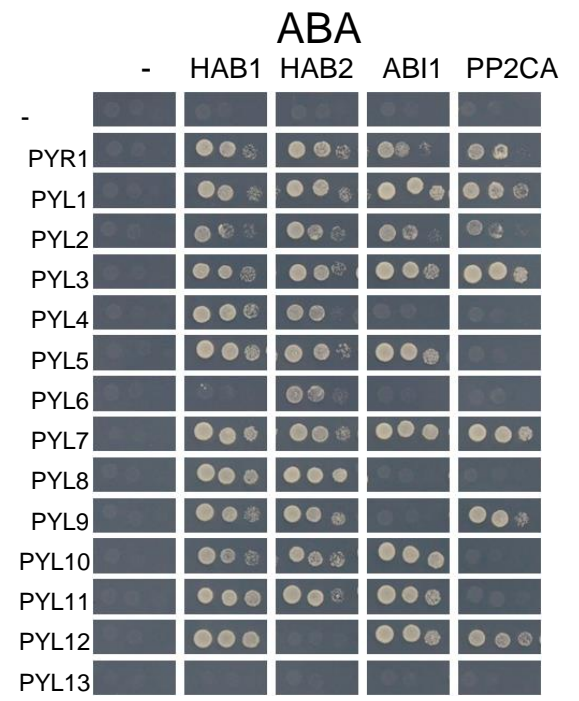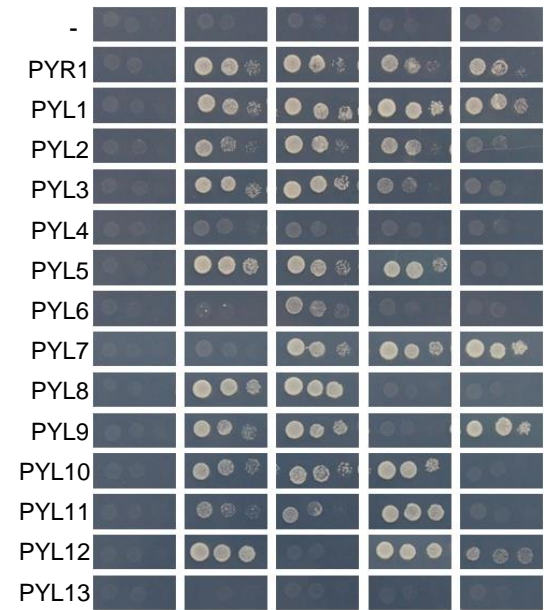

**AM1**

**Supplementary information, Figure S2** Yeast-two-hybrid assay indicates that AM1 interact with almost all ABA receptors.

Interactions of 14 PYR/PYLs fused with binding-domain (BD) with activation-domain (AD)-fused HAB1 on -Leu/-Trp/-His SD media containing (+)-ABA and corresponding compounds were determined by yeast-two-hybrid assay. Working concentration is 2 $\mu$ M for AM1, AM2 and (+)-ABA. -Leu/-Trp (-L/-T) and -Leu/-Trp/-His SD media containing 0.1%DMSO (DMSO) are used as positive and negative controls, respectively.
