# Supplementary material for: An ABA-mimicking ligand that reduces water loss and promotes drought resistance in plants
Source: PubMed Central journal article supplement — Cell Res. 2013 Jul 9;23(8):1043–54. doi: 10.1038/cr.2013.95 (PMC3731570; doi:10.1038/cr.2013.95), 2013-07-09
Supplement: cr201395x3.pdf [file cr201395x3.pdf]

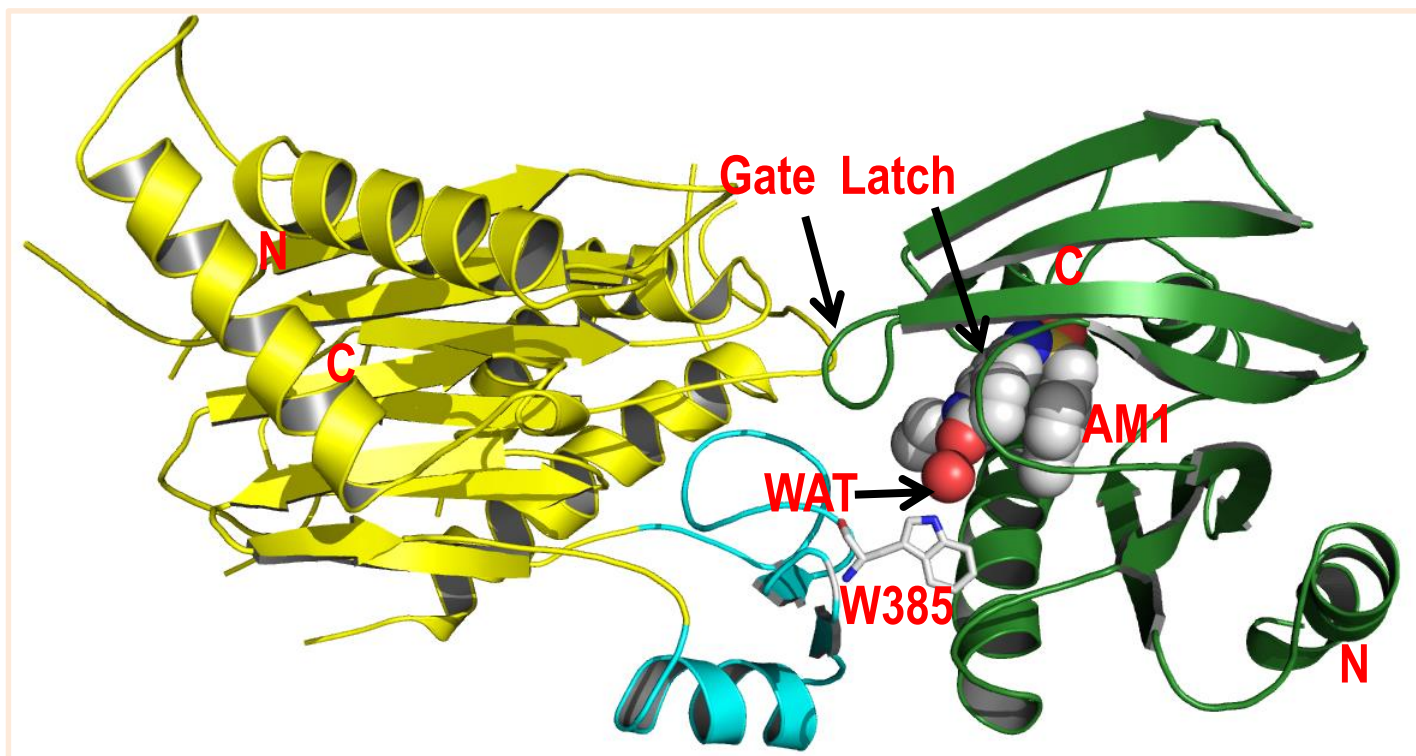

**Supplementary information, Figure S3** Structure overview of the PYL2-AM1-HAB1 complex. The N and C termini of PYL2 and HAB1, the locking residue Trp385 are indicated. AM1 and structural water is shown as ball representation.
