# Supplementary material for: An ABA-mimicking ligand that reduces water loss and promotes drought resistance in plants
Source: PubMed Central journal article supplement — Cell Res. 2013 Jul 9;23(8):1043–54. doi: 10.1038/cr.2013.95 (PMC3731570; doi:10.1038/cr.2013.95), 2013-07-09
Supplement: cr201395x4.pdf [file cr201395x4.pdf]

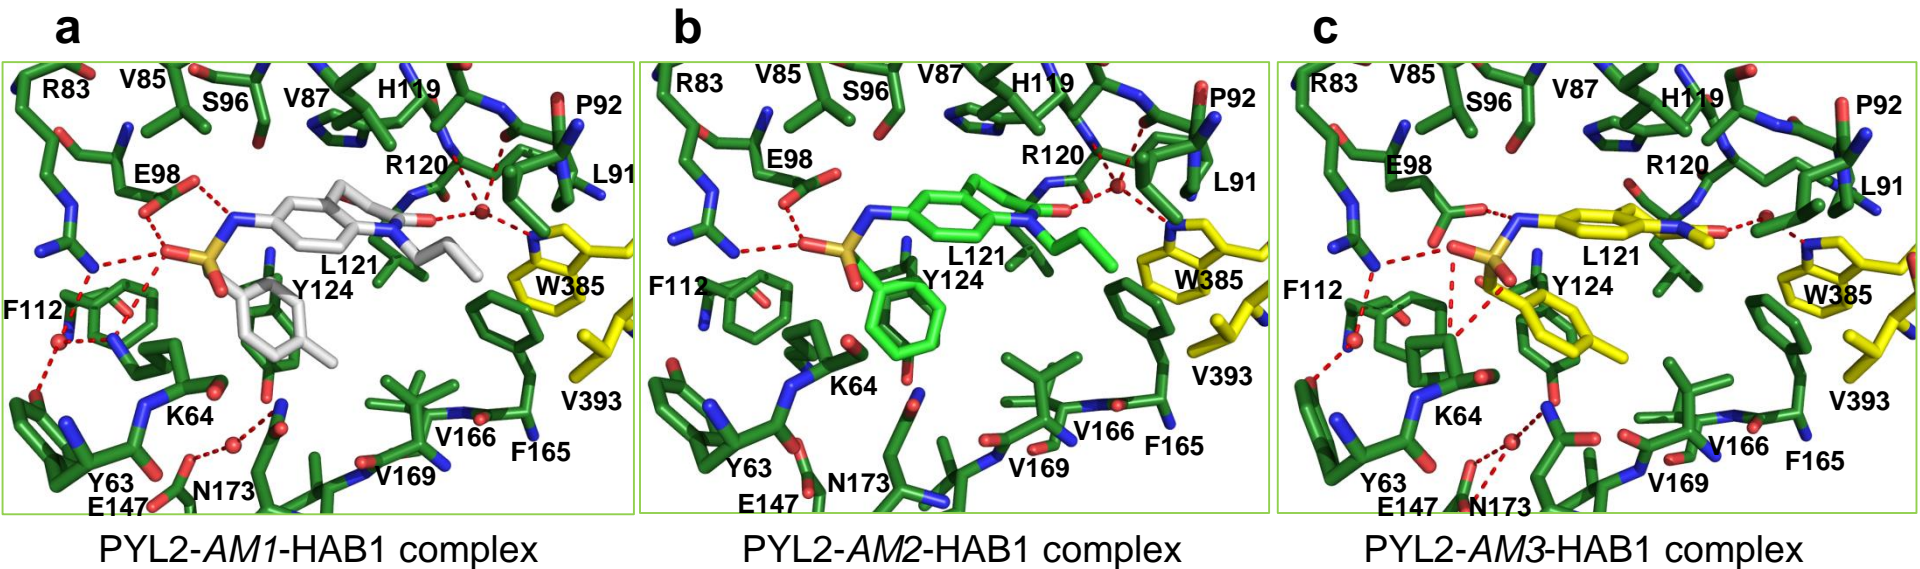

**Supplementary information, Figure S4** Schematic presentation of the interactions between PYL2 binding pocket residues and the bound AM1 (a), AM2 (b), and AM3 (c).
