# Supplementary material for: An ABA-mimicking ligand that reduces water loss and promotes drought resistance in plants
Source: PubMed Central journal article supplement — Cell Res. 2013 Jul 9;23(8):1043–54. doi: 10.1038/cr.2013.95 (PMC3731570; doi:10.1038/cr.2013.95), 2013-07-09
Supplement: cr201395x5.pdf [file cr201395x5.pdf]

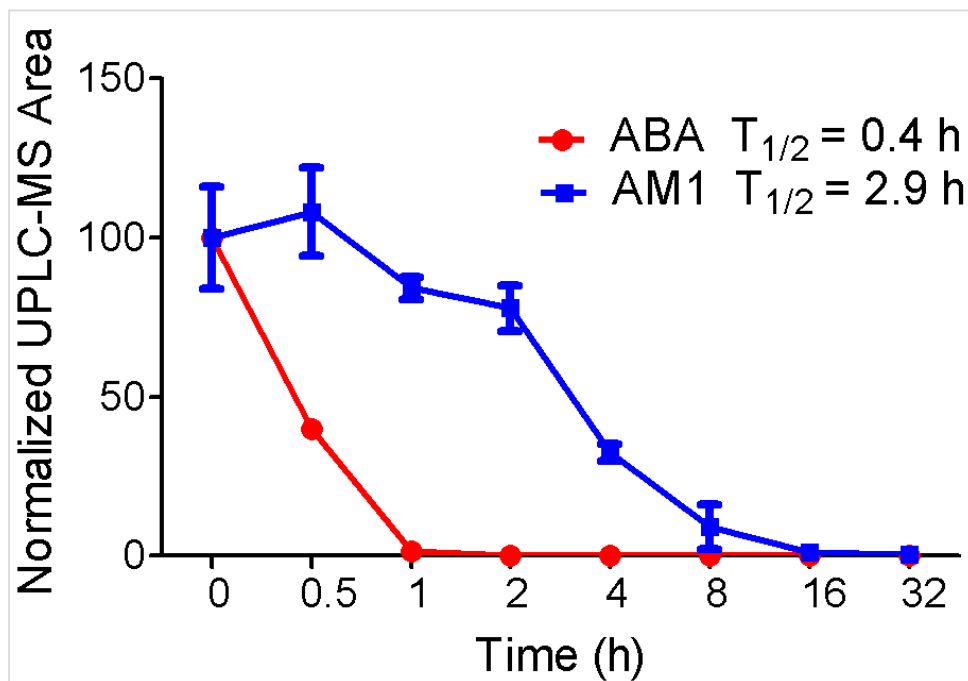

**Supplementary information, Figure S5** Stability Measurement of ABA and AM1. Compounds ABA and AM1 were dissolved in water to 100  $\mu$ M and were exposed to a UV light (8W). At indicated time points, one aliquot of 200  $\mu$ L was withdrawn and was subjected to LC-MS analysis. The amount of ABA and AM1 is quantitated by their corresponding peaks in the LC-MS profiles and the half-life of ABA and AM1 were calculated by SPSS program.
