# Supplementary material for: An ABA-mimicking ligand that reduces water loss and promotes drought resistance in plants
Source: PubMed Central journal article supplement — Cell Res. 2013 Jul 9;23(8):1043–54. doi: 10.1038/cr.2013.95 (PMC3731570; doi:10.1038/cr.2013.95), 2013-07-09
Supplement: cr201395x6.pdf [file cr201395x6.pdf]

**Supplementary information, Table S1** Statistics of data sets and structure refinement

|                                 | PYL2/AM1/HAB1                                 | PYL2/AM2/HAB1                                 | PYL2/AM3/HAB1                                 |
|---------------------------------|-----------------------------------------------|-----------------------------------------------|-----------------------------------------------|
| PDB code                        | 4LG5                                          | 4LGA                                          | 4LGB                                          |
| <b>Data collection</b>          |                                               |                                               |                                               |
| Beam line                       | SSRF-BL17U1                                   | SSRF-BL17U1                                   | SSRF-BL17U1                                   |
| Space group                     | P2 <sub>1</sub> 2 <sub>1</sub> 2 <sub>1</sub> | P2 <sub>1</sub> 2 <sub>1</sub> 2 <sub>1</sub> | P2 <sub>1</sub> 2 <sub>1</sub> 2 <sub>1</sub> |
| Resolution, Å                   | 30-2.88                                       | 30-2.70                                       | 30-3.15                                       |
| Cell parameters, Å, °           | a=60.83,<br>b=65.90,<br>c=146.23;<br>α=β=γ=90 | a=61.03,<br>b=67.16,<br>c=145.35;<br>α=β=γ=90 | a=60.96,<br>b=66.17,<br>c=143.84;<br>α=β=γ=90 |
| Total/Unique reflections        | 51771 /12560                                  | 62634/16757                                   | 37143/8417                                    |
| Completeness, %                 | 89.8(92.6)                                    | 97.9(99.6)                                    | 79.0 (58.2)                                   |
| I/σ                             | 10.6(2.0)                                     | 14.7(2.5)                                     | 8.1(2.0)                                      |
| Redundancy                      | 4.1(4.2)                                      | 3.7(3.9)                                      | 4.4(3.6)                                      |
| Rsym                            | 0.149(0.562)                                  | 0.103(0.720)                                  | 0.168(0.558)                                  |
|                                 |                                               |                                               |                                               |
| <b>Refinement</b>               |                                               |                                               |                                               |
| Resolution, Å                   | 30-2.88                                       | 30-2.70                                       | 30-3.15                                       |
| No. reflections                 | 9697                                          | 13831                                         | 6407                                          |
| No. residues                    | 498                                           | 496                                           | 495                                           |
| No. solvent molecules           | 61                                            | 49                                            | 47                                            |
| No. of non-H atoms              | 3818                                          | 3785                                          | 3774                                          |
| Rcryst                          | 22.9%                                         | 22.0%                                         | 21.5%                                         |
| Rfree                           | 29.9%                                         | 28.8%                                         | 31.5%                                         |
| rmsd bonds, Å                   | 0.011                                         | 0.008                                         | 0.009                                         |
| rmsd angles, °                  | 1.62                                          | 1.42                                          | 1.25                                          |
| Average Bfactor, Å <sup>2</sup> | 16.38                                         | 30.61                                         | 24.09                                         |

Rmsd is the root-mean-square deviation from ideal geometry of protein.
